# Supplementary material for: Trends in survival after a diagnosis of heart failure in the United Kingdom 2000-2017: population based cohort study
Source: PubMed Central journal article supplement (PMC6372921; doi:10.1136/bmj.l223), 2019-02-13
Supplement: tayc047415.ww1.pdf [file tayc047415.ww1.pdf]

Codes to identify heart failure in CPRD

| Medical code | Read code | Read term                                                   |
|--------------|-----------|-------------------------------------------------------------|
| 9913         | 1O1..00   | Heart failure confirmed                                     |
| 21837        | G232.00   | Hypertensive heart&renal dis wth (congestive) heart failure |
| 2062         | G58..00   | Heart failure                                               |
| 1223         | G58..11   | Cardiac failure                                             |
| 398          | G580.00   | Congestive heart failure                                    |
| 2906         | G580.11   | Congestive cardiac failure                                  |
| 10079        | G580.12   | Right heart failure                                         |
| 10154        | G580.13   | Right ventricular failure                                   |
| 9524         | G580.14   | Biventricular failure                                       |
| 23707        | G580000   | Acute congestive heart failure                              |
| 32671        | G580100   | Chronic congestive heart failure                            |
| 27884        | G580200   | Decompensated cardiac failure                               |
| 11424        | G580300   | Compensated cardiac failure                                 |
| 94870        | G580400   | Congestive heart failure due to valvular disease            |
| 884          | G581.00   | Left ventricular failure                                    |
| 43618        | G581.12   | Pulmonary oedema - acute                                    |
| 5255         | G581000   | Acute left ventricular failure                              |
| 27964        | G582.00   | Acute heart failure                                         |
| 101138       | G583.00   | Heart failure with normal ejection fraction                 |
| 101137       | G583.11   | HFNEF - heart failure with normal ejection fraction         |
| 106897       | G583.12   | Heart failure with preserved ejection fraction              |
| 104275       | G584.00   | Right ventricular failure                                   |
| 4024         | G58z.00   | Heart failure NOS                                           |
| 17278        | G58z.12   | Cardiac failure NOS                                         |
| 96799        | G5y4z00   | Post cardiac operation heart failure NOS                    |
| 66306        | SP11111   | Heart failure as a complication of care                     |

Codes to identify heart failure in hospital records

| ICD code | Term                                                                                        |
|----------|---------------------------------------------------------------------------------------------|
| I50      | Heart failure                                                                               |
| I50.0    | Congestive heart failure                                                                    |
| I50.1    | Left ventricular failure                                                                    |
| I50.9    | Heart failure, unspecified                                                                  |
| I11.0    | Hypertensive heart disease with (congestive) heart failure                                  |
| I13.0    | Hypertensive heart and renal disease with (congestive) heart failure                        |
| I13.2    | Hypertensive heart and renal disease with both (congestive) heart failure and renal failure |

Heart failure codes indicating preserved ejection fraction

| Medical code | Read code | Read term                                             |
|--------------|-----------|-------------------------------------------------------|
| 12314        | 585k.00   | Echocardiogram shows normal left ventricular function |
| 101138       | G583.00   | Heart failure with normal ejection fraction           |
| 101137       | G583.11   | HFNEF - heart failure with normal ejection fraction   |
| 106897       | G583.12   | Heart failure with preserved ejection fraction        |

Codes to identify echocardiography in CPRD

| Medical code | Read code | Read term                                                   |
|--------------|-----------|-------------------------------------------------------------|
| 1271         | 5853.11   | Echocardiogram                                              |
| 23268        | 5853      | U-S heart scan                                              |
| 1432         | 5853000   | Echocardiogram normal                                       |
| 5245         | 5853100   | Echocardiogram abnormal                                     |
| 11284        | 585f.00   | Echocardiogram shows left ventricular systolic dysfunction  |
| 18508        | 585R.00   | Echocardiogram normal                                       |
| 26886        | 33BD.00   | Echocardiogram requested                                    |
| 11351        | 585g.00   | Echocardiogram shows left ventricular diastolic dysfunction |
| 12314        | 585k.00   | Echocardiogram shows normal left ventricular function       |
| 27851        | 5853z00   | U-S heart scan NOS                                          |
| 30917        | 5C20.00   | Echocardiogram equivocal                                    |
| 10317        | R132000   | [D]Echocardiogram abnormal                                  |
| 11683        | 8HQ7.00   | Referral for echocardiography                               |
| 3919         | 7935200   | Transoesophageal echocardiography                           |
| 39134        | 7P0H400   | Stress echocardiography                                     |
| 89353        | 7935500   | Transluminal intracardiac echocardiography                  |
| 26449        | 7P0H.00   | Diagnostic echocardiography                                 |
| 26445        | 7P0H000   | Transthoracic echocardiography                              |
| 94626        | 7P0H300   | Epicardial echocardiography                                 |
| 90493        | 7P0Hz00   | Diagnostic echocardiography NOS                             |
| 105649       | 8A54400   | Monitoring of cardiac output using echocardiography         |
| 105899       | 8A58.00   | Transoesophageal echocardiographic monitoring               |
| 102428       | 8H7o000   | Fast track HF referral for transthoracic 2D echocardiogram  |
| 101184       | 9Ee0800   | Adult echocardiography procedure report                     |
| 106377       | 9EV7.00   | Echocardiography report received                            |
| 99841        | 7P0Hy00   | Other specified diagnostic echocardiography                 |
| 105341       | 7P0H600   | Contrast echocardiography                                   |
| 85952        | 7P0H100   | Transoesophageal echocardiography                           |

Codes to identify echocardiography in hospital records

| OPCS code | Term                                        |
|-----------|---------------------------------------------|
| U200      | Diagnostic echocardiography                 |
| U201      | Transthoracic echocardiography              |
| U202      | Transoesophageal echocardiography           |
| U203      | Intravascular echocardiography              |
| U204      | Epicardial echocardiography                 |
| U205      | Stress echocardiography                     |
| U208      | Other specified diagnostic Echocardiography |
| U209      | Unspecified diagnostic Echocardiography     |
