# Supplementary material for: Trends in survival after a diagnosis of heart failure in the United Kingdom 2000-2017: population based cohort study
Source: PubMed Central journal article supplement (PMC6372921; doi:10.1136/bmj.l223), 2019-02-13

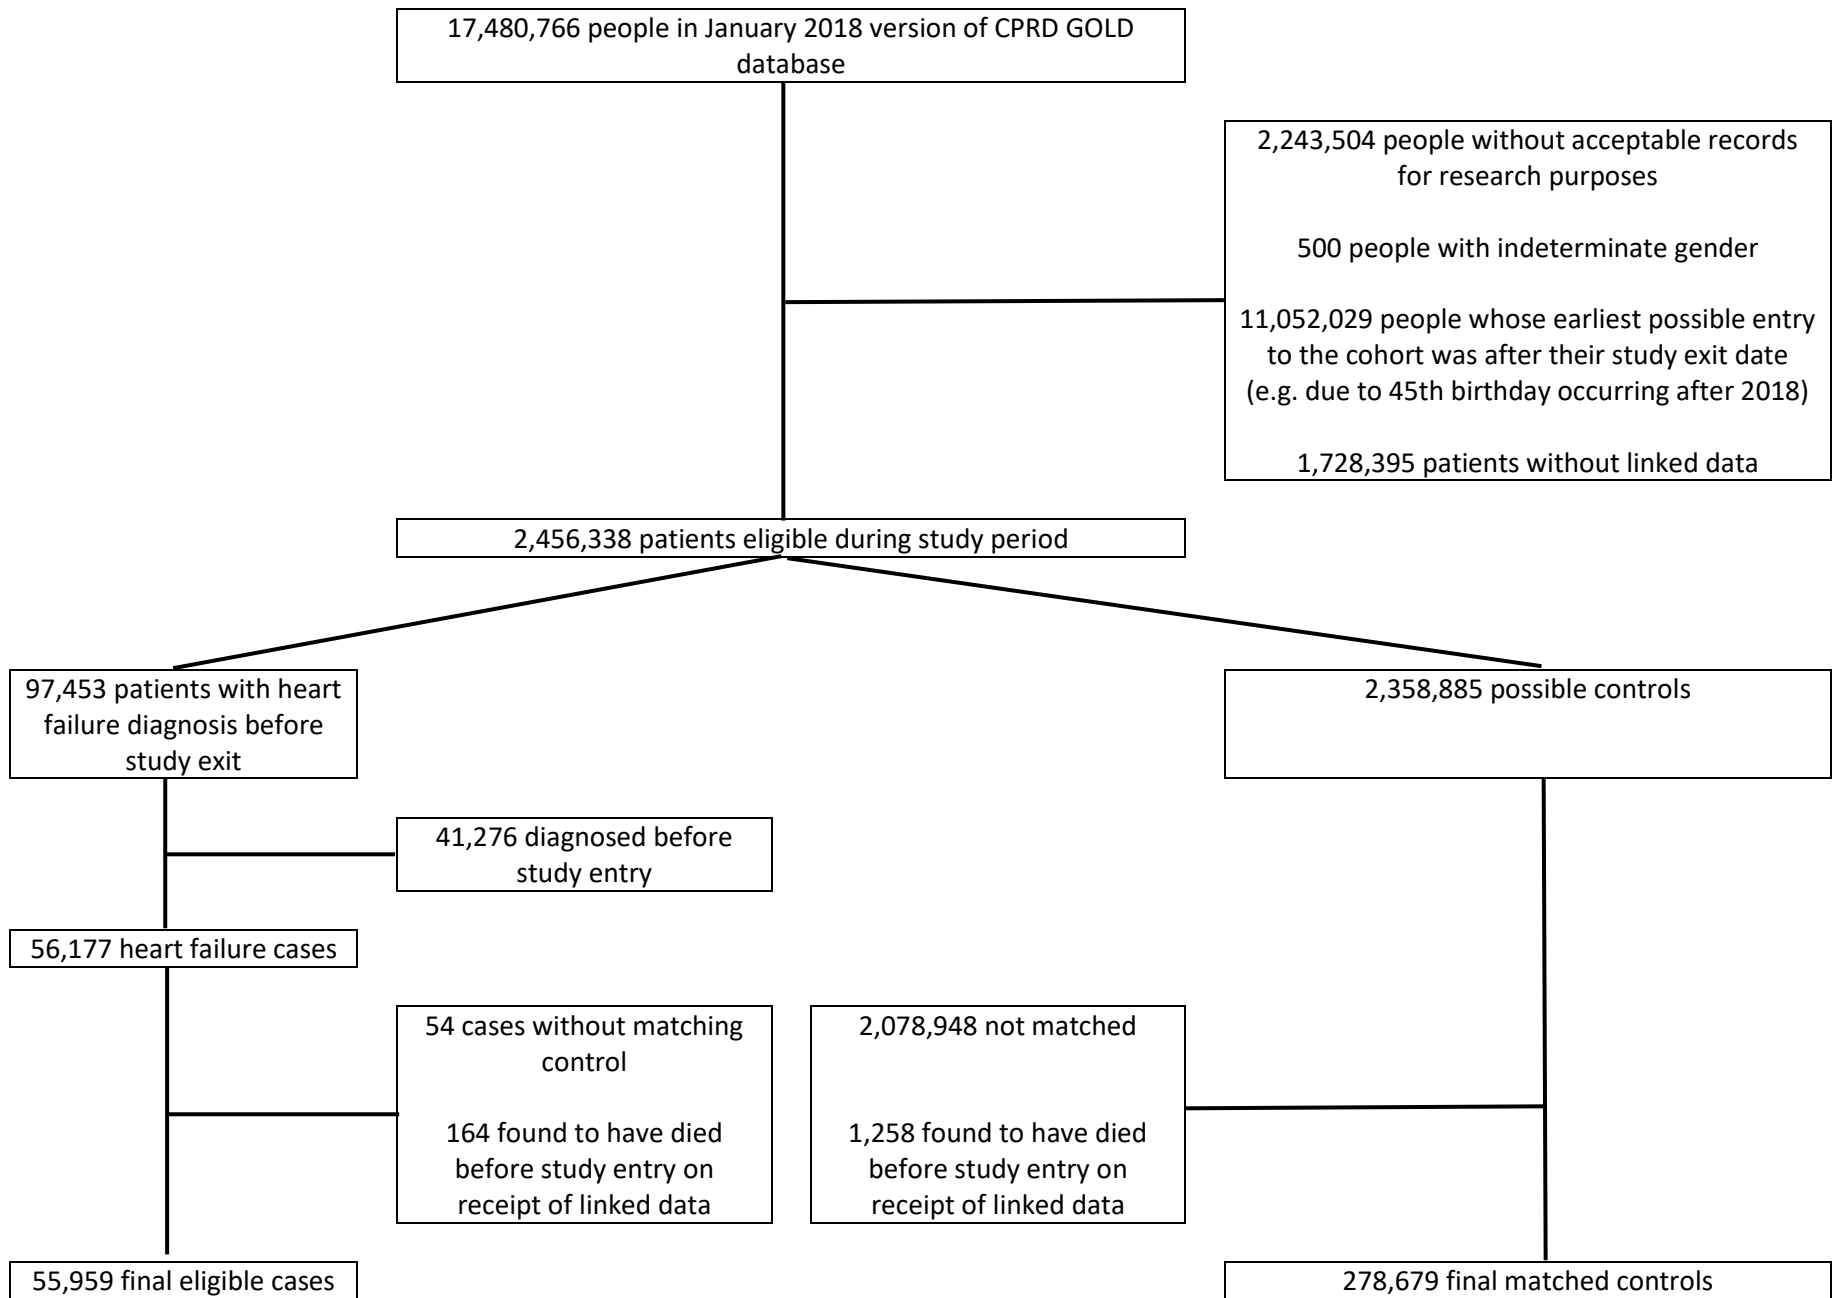

Supplement: tayc047415.ww2.pdf [file tayc047415.ww2.pdf]
