# Supplementary material for: Trends in survival after a diagnosis of heart failure in the United Kingdom 2000-2017: population based cohort study
Source: PubMed Central journal article supplement (PMC6372921; doi:10.1136/bmj.l223), 2019-02-13
Supplement: tayc047415.ww3.pdf [file tayc047415.ww3.pdf]

**Table 1: Baseline characteristics of people with heart failure and matched comparators and, in the heart failure group, by hospitalisation and socioeconomic status**

| Characteristic                                  | Cohort        |        |                  |        | Heart Failure                            |        |        |        |        | Heart Failure                          |       |               |  |
|-------------------------------------------------|---------------|--------|------------------|--------|------------------------------------------|--------|--------|--------|--------|----------------------------------------|-------|---------------|--|
|                                                 | Heart Failure |        | No Heart Failure |        | Hospitalisation around time of diagnosis |        |        |        |        | Index of Multiple Deprivation quintile |       |               |  |
|                                                 | n             | %      | n                | %      | Yes                                      |        | No     |        |        | Least deprived                         |       | Most deprived |  |
|                                                 | n             | %      | n                | %      | n                                        | %      | n      | %      | n      | %                                      | n     | %             |  |
| <b>Overall, n (%)</b>                           | 55,959        | (100)  | 278,679          | (100)  | 24,125                                   | (43.1) | 31,834 | (56.9) | 10,854 | (19.4)                                 | 8,447 | (15.1)        |  |
| <b>Sex, n (%)</b>                               |               |        |                  |        |                                          |        |        |        |        |                                        |       |               |  |
| <i>Male</i>                                     | 29,234        | (52.2) | 145,552          | (52.2) | 12,438                                   | (42.5) | 16,796 | (57.5) | 5,885  | (20.1)                                 | 4,282 | (14.6)        |  |
| <i>Female</i>                                   | 26,725        | (47.8) | 133,127          | (47.8) | 11,687                                   | (43.7) | 15,038 | (56.3) | 4,969  | (18.6)                                 | 4,165 | (15.6)        |  |
| <b>Age, mean (SD)</b>                           | 77.08         | (10.6) | 76.08            | (10.4) | 77.62                                    | (10.7) | 76.67  | (10.4) | 78.24  | (10.2)                                 | 74.86 | (11)          |  |
| <b>Age category, n (%)</b>                      |               |        |                  |        |                                          |        |        |        |        |                                        |       |               |  |
| <i>45-54</i>                                    | 1,938         | (3.5)  | 11,056           | (4.0)  | 855                                      | (44.1) | 1,083  | (55.9) | 268    | (13.8)                                 | 444   | (22.9)        |  |
| <i>55-64</i>                                    | 5,426         | (9.7)  | 29,124           | (10.5) | 2,231                                    | (41.1) | 3,195  | (58.9) | 895    | (16.5)                                 | 1,121 | (20.7)        |  |
| <i>65-74</i>                                    | 12,485        | (22.3) | 67,851           | (24.3) | 5,018                                    | (40.2) | 7,467  | (59.8) | 2,182  | (17.5)                                 | 2,141 | (17.1)        |  |
| <i>75-84</i>                                    | 21,534        | (38.5) | 110,015          | (39.5) | 9,057                                    | (42.1) | 12,477 | (57.9) | 4,317  | (20.0)                                 | 3,082 | (14.3)        |  |
| <i>85-94</i>                                    | 13,453        | (24.0) | 57,065           | (20.5) | 6,405                                    | (47.6) | 7,048  | (52.4) | 2,931  | (21.8)                                 | 1,549 | (11.5)        |  |
| <i>95+</i>                                      | 1,123         | (2.0)  | 3,568            | (1.3)  | 559                                      | (49.8) | 564    | (50.2) | 261    | (23.2)                                 | 110   | (9.8)         |  |
| <b>Ethnic group, n (%)</b>                      |               |        |                  |        |                                          |        |        |        |        |                                        |       |               |  |
| <i>White</i>                                    | 44,143        | (78.9) | 204,936          | (73.5) | 19,547                                   | (44.3) | 24,596 | (55.7) | 8,643  | (19.6)                                 | 6,574 | (14.9)        |  |
| <i>Non-white</i>                                | 1,497         | (2.7)  | 6,516            | (2.3)  | 694                                      | (46.4) | 803    | (53.6) | 194    | (13.0)                                 | 359   | (24.0)        |  |
| <i>Mixed</i>                                    | 6,585         | (11.8) | 38,114           | (13.7) | 2,970                                    | (45.1) | 3,615  | (54.9) | 1,194  | (18.1)                                 | 1,026 | (15.6)        |  |
| <i>Missing</i>                                  | 3,734         | (6.7)  | 29,113           | (10.4) | 914                                      | (24.5) | 2,820  | (75.5) | 823    | (22.0)                                 | 488   | (13.1)        |  |
| <b>Index of multiple deprivation (quintile)</b> |               |        |                  |        |                                          |        |        |        |        |                                        |       |               |  |
| 1 (least deprived)                              | 10,854        | (19.4) | 60,020           | (21.5) | 4,360                                    | (40.2) | 6,494  | (59.8) | 10,854 | (100)                                  |       |               |  |
| 2                                               | 12,954        | (23.1) | 68,200           | (24.5) | 5,526                                    | (42.7) | 7,428  | (57.3) |        |                                        |       |               |  |
| 3                                               | 11,947        | (21.3) | 58,956           | (21.2) | 5,099                                    | (42.7) | 6,848  | (57.3) |        |                                        |       |               |  |
| 4                                               | 11,707        | (20.9) | 53,778           | (19.3) | 5,250                                    | (44.8) | 6,457  | (55.2) |        |                                        |       |               |  |
| 5 (most deprived)                               | 8,447         | (15.1) | 37,450           | (13.4) | 3,866                                    | (45.8) | 4,581  | (54.2) |        |                                        | 8,447 | (100)         |  |
| Missing                                         | 50            | (0.1)  | 75               | (0.1)  | 24                                       | (0.1)  | 52     | (0.1)  |        |                                        |       |               |  |
| <b>Smoking status, n (%)</b>                    |               |        |                  |        |                                          |        |        |        |        |                                        |       |               |  |
| <i>Never</i>                                    | 21,252        | (38.0) | 123,460          | (44.3) | 8,879                                    | (41.8) | 12,373 | (58.2) | 4,711  | (22.2)                                 | 2,589 | (12.2)        |  |
| <i>Former</i>                                   | 7,094         | (12.7) | 31,494           | (11.3) | 3,255                                    | (45.9) | 3,839  | (54.1) | 930    | (13.1)                                 | 1,756 | (24.8)        |  |
| <i>Current</i>                                  | 24,507        | (43.8) | 100,719          | (36.1) | 10,917                                   | (44.5) | 13,590 | (55.5) | 4,661  | (19.0)                                 | 3,639 | (14.8)        |  |

|                                   |        |        |         |        |        |        |        |        |       |        |        |        |
|-----------------------------------|--------|--------|---------|--------|--------|--------|--------|--------|-------|--------|--------|--------|
| <i>Missing</i>                    | 3,106  | (5.6)  | 23,006  | (8.3)  | 1,074  | (34.6) | 2,032  | (65.4) | 552   | (17.8) | 463    | (14.9) |
| <b>SBP, n (%)</b>                 |        |        |         |        |        |        |        |        |       |        |        |        |
| <i>Mean (SD) (mmHg)</i>           | 137.54 | (21)   | 139.59  | (18.0) | 136.18 | (21.2) | 138.58 | (20.7) | 137.2 | (20.7) | 137.92 | (21.1) |
| <i>Missing</i>                    | 1,272  | (2.3)  | 14,367  | (5.2)  | 426    | (33.5) | 846    | (66.5) | 287   | (22.6) | 201    | (15.8) |
| <b>DBP, n (%)</b>                 |        |        |         |        |        |        |        |        |       |        |        |        |
| <i>Mean(SD) (mmHg)</i>            | 76.89  | (11.6) | 77.64   | (10.0) | 76.24  | (11.9) | 77.39  | (11.3) | 76.96 | (11.5) | 77.23  | (11.8) |
| <i>Missing</i>                    | 1,272  | (2.3)  | 14,367  | (5.2)  | 426    | (33.5) | 846    | (66.5) | 287   | (22.6) | 201    | (15.8) |
| <b>Total cholesterol, n (%)</b>   |        |        |         |        |        |        |        |        |       |        |        |        |
| <i>Mean(SD)(mmol/L)</i>           | 4.69   | (3.6)  | 5.03    | (2.5)  | 4.66   | (5.2)  | 4.72   | (1.2)  | 4.66  | (1.2)  | 4.64   | (1.2)  |
| <i>Missing</i>                    | 15,478 | (27.7) | 104,041 | (37.3) | 5,801  | (37.5) | 9,677  | (62.5) | 2,939 | (19.0) | 2,320  | (15.0) |
| <b>BMI, n (%)</b>                 |        |        |         |        |        |        |        |        |       |        |        |        |
| <i>Mean(SD)(kg/m<sup>2</sup>)</i> | 27.93  | (6.1)  | 26.53   | (4.8)  | 27.98  | (6.3)  | 27.88  | (5.9)  | 27.31 | (5.4)  | 28.6   | (6.6)  |
| <i>Missing</i>                    | 8,428  | (15.1) | 50,110  | (18)   | 3,356  | (39.8) | 5,072  | (60.2) | 1,610 | (19.1) | 1,272  | (15.1) |
| <b>Medical History</b>            |        |        |         |        |        |        |        |        |       |        |        |        |
| <b>AF, n (%)</b>                  | 14,629 | (26.1) | 20,910  | (7.5)  | 6,554  | (44.8) | 8,075  | (55.2) | 3,094 | (21.1) | 1,930  | (13.2) |
| <b>Angina, n (%)</b>              | 11,965 | (21.4) | 29,508  | (10.6) | 5,116  | (42.8) | 6,849  | (57.2) | 2,091 | (17.5) | 1,993  | (16.7) |
| <b>Diabetes, n (%)</b>            | 13,104 | (23.4) | 38,824  | (13.9) | 6,589  | (50.3) | 6,515  | (49.7) | 2,198 | (16.8) | 2,315  | (17.7) |
| <b>Hypertension n (%)</b>         | 32,316 | (57.7) | 130,669 | (46.9) | 14,623 | (45.3) | 17,693 | (54.7) | 6,260 | (19.4) | 4,873  | (15.1) |
| <b>IHD, n (%)</b>                 | 14,606 | (26.1) | 31,517  | (11.3) | 6,280  | (43.0) | 8,326  | (57.0) | 2,614 | (17.9) | 2,500  | (17.1) |
| <b>MI, n (%)</b>                  | 11,296 | (20.2) | 17,537  | (6.3)  | 5,223  | (46.2) | 6,073  | (53.8) | 2,111 | (18.7) | 1,825  | (16.2) |
| <b>Stroke, n (%)</b>              | 6,271  | (11.2) | 19,409  | (7.0)  | 2,964  | (47.3) | 3,307  | (52.7) | 1,175 | (18.7) | 990    | (15.8) |
| <b>VHD, n (%)</b>                 | 4,154  | (7.4)  | 6,165   | (2.2)  | 2,097  | (50.5) | 2,057  | (49.5) | 937   | (22.6) | 466    | (11.2) |
| <b>Other CVD, n (%)</b>           | 13,757 | (24.6) | 34,578  | (12.4) | 6,051  | (44.0) | 7,706  | (56.0) | 2,750 | (20.0) | 2,008  | (14.6) |
| <b>Year, n (%)</b>                |        |        |         |        |        |        |        |        |       |        |        |        |
| <i>2000</i>                       | 3,698  | (6.6)  | 18,437  | (6.6)  | 1,070  | (28.9) | 2,628  | (71.1) | 660   | (17.8) | 665    | (18.0) |
| <i>2001</i>                       | 4,368  | (7.8)  | 21,771  | (7.8)  | 1,257  | (28.8) | 3,111  | (71.2) | 783   | (17.9) | 741    | (17.0) |
| <i>2002</i>                       | 4,312  | (7.7)  | 21,465  | (7.7)  | 1,324  | (30.7) | 2,988  | (69.3) | 836   | (19.4) | 631    | (14.6) |
| <i>2003</i>                       | 4,337  | (7.8)  | 21,599  | (7.8)  | 1,478  | (34.1) | 2,859  | (65.9) | 857   | (19.8) | 628    | (14.5) |
| <i>2004</i>                       | 3,830  | (6.8)  | 19,061  | (6.8)  | 1,474  | (38.5) | 2,356  | (61.5) | 730   | (19.1) | 608    | (15.9) |
| <i>2005</i>                       | 3,550  | (6.3)  | 17,675  | (6.3)  | 1,502  | (42.3) | 2,048  | (57.7) | 683   | (19.2) | 528    | (14.9) |
| <i>2006</i>                       | 3,128  | (5.6)  | 15,583  | (5.6)  | 1,358  | (43.4) | 1,770  | (56.6) | 579   | (18.5) | 503    | (16.1) |
| <i>2007</i>                       | 3,090  | (5.5)  | 15,365  | (5.5)  | 1,418  | (45.9) | 1,672  | (54.1) | 558   | (18.1) | 483    | (15.6) |
| <i>2008</i>                       | 3,121  | (5.6)  | 15,516  | (5.6)  | 1,451  | (46.5) | 1,670  | (53.5) | 564   | (18.1) | 514    | (16.5) |
| <i>2009</i>                       | 3,265  | (5.8)  | 16,261  | (5.8)  | 1,621  | (49.6) | 1,644  | (50.4) | 633   | (19.4) | 468    | (14.3) |
| <i>2010</i>                       | 3,114  | (5.6)  | 15,510  | (5.6)  | 1,613  | (51.8) | 1,501  | (48.2) | 574   | (18.4) | 428    | (13.7) |
| <i>2011</i>                       | 2,994  | (5.4)  | 14,933  | (5.4)  | 1,576  | (52.6) | 1,418  | (47.4) | 562   | (18.8) | 440    | (14.7) |

|      |       |       |        |       |       |        |       |        |     |        |     |        |
|------|-------|-------|--------|-------|-------|--------|-------|--------|-----|--------|-----|--------|
| 2012 | 3,189 | (5.7) | 15,867 | (5.7) | 1,730 | (54.2) | 1,459 | (45.8) | 638 | (20.0) | 492 | (15.4) |
| 2013 | 2,963 | (5.3) | 14,753 | (5.3) | 1,557 | (52.5) | 1,406 | (47.5) | 586 | (19.8) | 420 | (14.2) |
| 2014 | 2,648 | (4.7) | 13,191 | (4.7) | 1,371 | (51.8) | 1,277 | (48.2) | 565 | (21.3) | 323 | (12.2) |
| 2015 | 2,164 | (3.9) | 10,781 | (3.9) | 1,147 | (53.0) | 1,017 | (47.0) | 476 | (22.0) | 287 | (13.3) |
| 2016 | 1,503 | (2.7) | 7,493  | (2.7) | 815   | (54.2) | 688   | (45.8) | 363 | (24.2) | 190 | (12.6) |
| 2017 | 685   | (1.2) | 3,418  | (1.2) | 363   | (53.0) | 322   | (47.0) | 207 | (30.2) | 98  | (14.3) |

**Abbreviations:** AF: Atrial Fibrillation; BMI: Body Mass Index; CVD: Cardiovascular disease; DBP: Diastolic Blood Pressure; IHD: Ischaemic Heart Disease; MI: Myocardial Infarction; SBP: Systolic Blood Pressure; VHD: Valvular Heart Disease.
